# Supplementary material for: Synthesis of potential theranostic system consisting of methotrexate-immobilized (3-aminopropyl)trimethoxysilane coated α-Bi2O3 nanoparticles for cancer treatment
Source: Royal Society of Chemistry journal article supplement (doi:10.1039/c4ra02160f), 2014-01-01
Supplement: c4ra02160f1.pdf [file c4ra02160f1.pdf]

## Electronic supplement information:

# Synthesis of Potential Theranostic System Consisting of Methotrexate-Immobilized (3- Aminopropyl)trimethoxysilane Coated $\alpha$ -Bi<sub>2</sub>O<sub>3</sub> Nanoparticles for Cancer Treatment

*Kathrin Bogusz*<sup>1,2,3</sup>, *Moeava Tehei*<sup>2,3,4</sup>, *Callum Stewart*<sup>1,2,3</sup>, *Marjorie McDonald*<sup>3,4</sup>,  
*Dean Cardillo*<sup>1,2,3</sup>, *Michael Lerch*<sup>3,4</sup>, *Stéphanie Corde*<sup>4,5</sup>, *Anatoly Rosenfeld*<sup>4</sup>, *Hua  
Kun Liu*<sup>1</sup>, *Konstantin Konstantinov*<sup>\*1,6</sup>

<sup>1</sup>*Institute for Superconducting and Electronic Materials, Australian Institute for Innovative  
Materials, University of Wollongong, NSW, Australia*

<sup>2</sup>*School of Chemistry, University of Wollongong, Wollongong, NSW, Australia*

<sup>3</sup>*Illawarra Health and Medical Research Institute, University of Wollongong, NSW, Australia*

<sup>4</sup>*Centre for Medical and Radiation Physics, Faculty of Engineering and Information Science,  
University of Wollongong, NSW, Australia*

<sup>5</sup>*Radiation Oncology Department, Prince of Wales Hospital, Randwick, NSW2031, Australia*

<sup>6</sup>*School of Mechanical, Materials, and Mechatronic Engineering, Faculty of Engineering and  
Information Science, University of Wollongong, NSW, Australia*

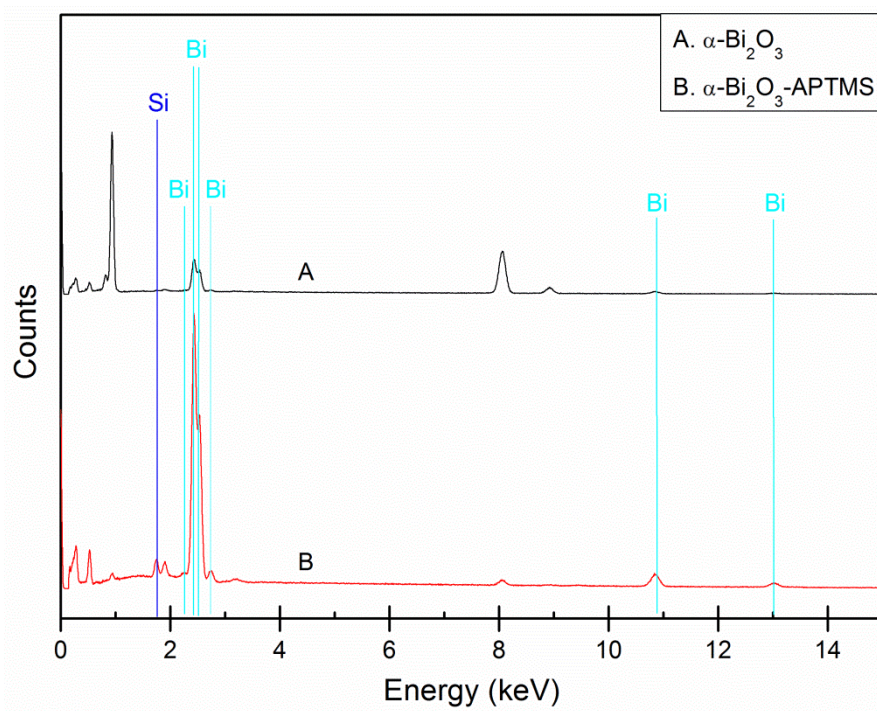

**Fig. S1:** EDS spectra of (A) uncoated  $\alpha\text{-Bi}_2\text{O}_3$  NPs and (B) APTMS coated  $\alpha\text{-Bi}_2\text{O}_3$  NPs.
